# Supplementary material
Source: PubMed Central journal article supplement (PMC3091184)
Supplement: supp_M110.187757_jbc.M110.187757-1.pdf [file supp_M110.187757_jbc.M110.187757-1.pdf]

## Supplemental Figure 1

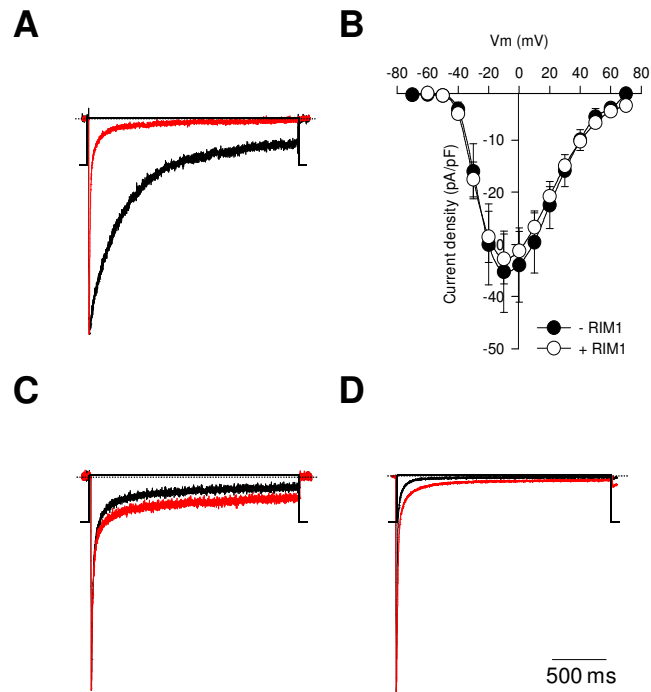

Supplemental Figure 1. A) Superimposed whole cell current traces evoked by 2-s depolarizing voltage steps from -80 to -30 mV in HEK-293 cells expressing Ca<sub>v</sub>1.3α1/Ca<sub>v</sub>α<sub>2</sub>δ-1/Ca<sub>v</sub>β<sub>3</sub> channels, using Ba<sup>2+</sup> (black) or Ca<sup>2+</sup> (red) as the charge carrier. B) Average current density-voltage relationships for *I*<sub>Ca</sub> recorded from HEK-293 cells expressing Ca<sub>v</sub>1.3α1/Ca<sub>v</sub>α<sub>2</sub>δ-1/Ca<sub>v</sub>β<sub>3</sub> channels in absence and presence of RIM1 as indicated. C, D) Representative *I*<sub>Ca</sub> traces recorded by 2-s depolarizing voltage steps from -80 to -30 and -20 mV in HEK-293 cells expressing recombinant channels formed of Ca<sub>v</sub>1.3α1/Ca<sub>v</sub>α<sub>2</sub>δ-1 together with Ca<sub>v</sub>β<sub>2</sub> or Ca<sub>v</sub>β<sub>3</sub> subunits, respectively, in absence (black traces) and presence (red traces), of RIM1. Peak amplitude of the currents before and after RIM1 co-expression was normalized for comparison.
