# Supplementary material
Source: PubMed Central journal article supplement (PMC3091184)
Supplement: supp_M110.187757_jbc.M110.187757-2.pdf [file supp_M110.187757_jbc.M110.187757-2.pdf]

## Supplemental Figure 2

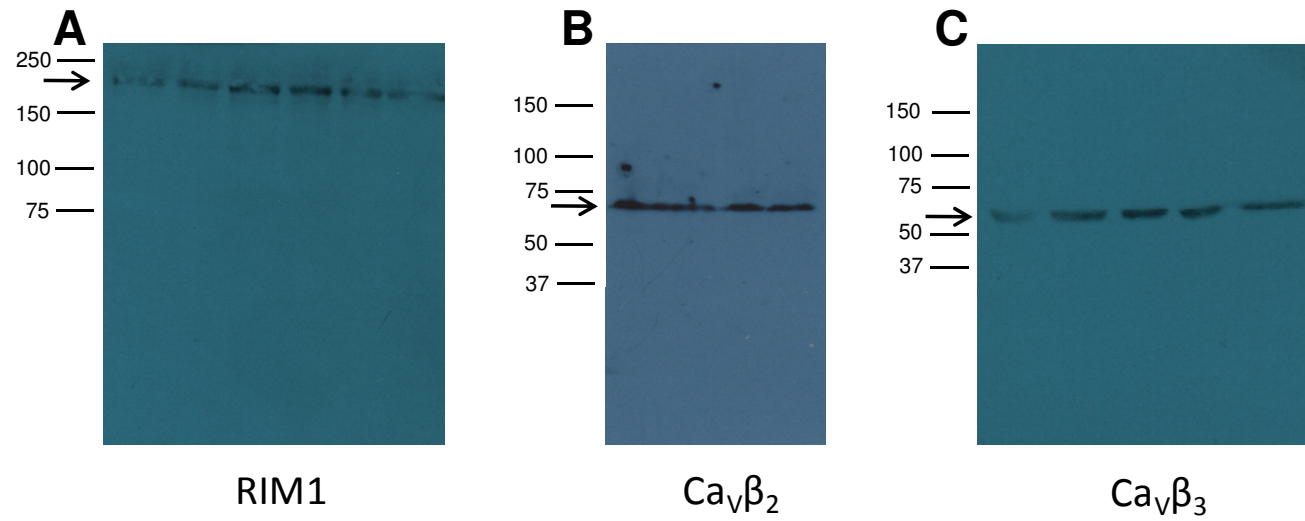

Supplemental Figure 2. Western blot analysis of extracts from RIN-m5F cells showing good sensitivity of the antibodies used in this study for detecting RIM1, and the Ca<sub>v</sub> channel β<sub>2</sub> and β<sub>3</sub> subunits as indicated. The single bands marked by arrows correspond in size to the mentioned proteins indicating specificity of the respective antibodies.
