# Supplementary material
Source: PubMed Central journal article supplement (PMC3091184)
Supplement: supp_M110.187757_jbc.M110.187757-3.pdf [file supp_M110.187757_jbc.M110.187757-3.pdf]

### Supplemental Figure 3

$\beta_3/\alpha_2\delta$ -1 transfected HEK-293 cells

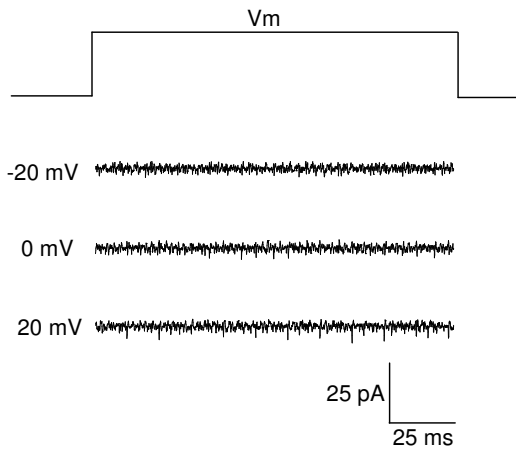

Supplemental Figure 3. Representative traces obtained after the application of depolarizing voltage steps from -20 to +20 mV in  $\text{Ca}_v\beta_3/\alpha_2\delta$ -1 transfected HEK-293 cells.
